# Supplementary material for: Tumour-associated macrophages mediate the invasion and metastasis of bladder cancer cells through CXCL8
Source: PeerJ. 2020 Mar 12;8:e8721. doi: 10.7717/peerj.8721 (PMC7073239; doi:10.7717/peerj.8721)
Supplement: Data S1 [file peerj-08-8721-s001.xlsx]

## Sheet: FIG 1
	Percentage CXCL8-positive cells（%）		Number of TAMs infiltrated in tumour	Percentage of MMP-9 positive cells（%）	Percentage of VEGF positive cells（%）	Percentage of E-cadheirn positive cells（%）
Number	CANCER	PARA-CANCER	TUMOR	TUMOR	TUMOR	TUMOR
1	54.92	53.97	12	71.43	19.08	15.79
2	66.67	24.59	13	72.57	58.78	15.29
3	35.34	17.91	7	65.25	32.8	8.24
4	50.34	14.52	15	58.47	49.62	10.53
5	67.46	42.86	8	91.84	41.01	10.96
6	27.37	58.49	9	62.6	42.22	8.11
7	69.11	62.5	16	83.61	49.29	12.09
8	29.71	81.82	12	69.6	22.9	14.1
9	90.82	19.3	24	99.07	61.29	5.13
10	67.62	9.09	5	85.34	65	14.29
11	34.34	6.98	11	77.23	38.89	18.84
12	55	45.45	14	70.54	65.87	15.58
13	61.68	21.74	13	68.93	38.93	14.63
14	30.71	6.56	15	79.17	31.75	25
15	63.28	68.66	17	80.33	46.83	13.89
16	69.12	10.45	10	97.17	50.71	7.89
17	94.55	41.18	14	70.64	66.18	8.45
18	75.53	50.75	17	83.17	75.91	20.73
19	62.5	4.17	24	63.06	50.39	16.09
20	64.58	27.54	22	95.5	60	12.31
21	51.72	20	18	58.93	59.85	24.44
22	54.4	28.57	12	52.85	55.56	13.41
23	53.68	45.24	12	78.79	35.77	6.58
24	64.8	52.46	18	82.42	63.87	9.59
25	25	4.17	8	84.68	41.48	25
26	61.98	14.04	17	65.49	70.63	24
27	52.63	34.62	9	85.57	61.11	5.26
28	57.14	20	12	81.63	54.33	6.67
29	68.63	68.09	15	80.85	87.9	5.56
30	88.89	61.11	23	77.89	71.09	1.22
31	53.61	36.54	15	77.6	30.77	25.32
32	33.6	36.36	11	69.16	37.69	25
33	57.94	28.85	11	86.54	55.15	17.39
34	22.83	34.78	11	58.2	34.31	22.99
35	46.81	19.23	15	53.28	41.98	23.19
36	53.66	9.43	17	58.68	86.72	21.43
37	46.08	29.51	17	95.24	60.16	21.43
38	41.82	27.78	18	65.81	55.07	22.22
39	89	29.51	16	84.69	72.44	6.67
40	51.85	14.75	15	68.52	60.74	18.18
41	55.78	66.67	14	76.53	56.35	2.3
42	63.5	17.86	19	70.87	68.84	5.06
43	29.41	35.09	7	66.67	57.69	20.22
44	51.85	27.27	17	77.69	90.98	22.35
45	53.15	19.23	15	71.13	56.93	26.76
46	70.31	51.47	12	73.63	76.3	8.33
47	71.68	72.34	11	76.24	53.54	1.39
48	21.37	19.64	13	67.72	28.57	1.15
49	69.31	18.75	10	91.15	66.67	7.5
50	82.08	78.33	18	93.52	87.1	15.56
51	74.82	19.64	17	90.91	55.2	3.75
52	66.96	62.5	30	72.38	70.31	16.05
53	47.25	29.31	19	69.09	78.05	20.27
54	76.47	42.86	18	92.47	81.45	9.09
55	66.36	24.62	13	88.66	64.1	23.94

## Sheet: FIG 2B
DAYS	0 ng/ml IL-4			5 ng/ml IL-4			10 ng/ml IL-4			20ng/ml IL-4			40 ng/ml IL-4
1	39.9894	39.8967	38.9715	38.6592	37.941	38.1133	46.4979	45.8688	46.8131	57.0989	58.0486	57.3122	13.3687	13.9149	12.8127
2	34.5709	32.7889	34.9878	39.2297	38.9755	38.8132	51.1607	51.109	51.5817	55.1954	53.6451	53.6806	32.6099	32.4173	31.7206
3	60.2347	60.2131	59.2123	67.8268	67.106	66.7817	77.292	77.6385	78.0383	83.1558	82.9392	83.7406	51.1259	50.451	51.4443
4	78.0596	77.3242	77.9124	74.2984	75.1646	75.1857	87.3498	87.6151	86.9738	101.584	102.246	101.191	80.5845	79.8703	80.4558
5	82.1823	82.8623	81.3964	89.752	90.683	90.7142	103.009	102.467	103.322	113.161	114.071	113.477	99.5035	98.7242	99.1487

## Sheet: FIG 2C
IL-4 treated (ng/ml)	Concentration of CXCL8 for 48h (ng/ml)
0	34.5709	29.9235	30.6429
5	39.0061	36.0864	41.0433
10	51.2838	46.9579	53.0762
20	54.1737	54.0962	60.2375
40	32.2493	25.9634	18.8623

## Sheet: FIG 2D
		IL-4 treated (ng/ml)
		0	5	10	20	40
	RT-PCR CXCL8 mean Cq	33.25	31.62	25.31	28.98	30.97
		32.82	25.21	29.23	28.6	32.02
		33.84	32.82	31.9	28.51	32.88
	RT-PCR GADPH mean Cq	27.2	27.2	22.4	27.17	26.17
		26	22.4	26	26.17	27.07
		27.17	26	27.43	27.07	27.2

## Sheet: FIG 2E
	RT-PCR CD163 mean Cq	5637
		Cq	Cq SD
	THP-1	17.63	0.19133
	TAM	26.05	0.03177
	RT-PCR GADPH mean Cq	5637
		Cq	Cq SD
	THP-1	19.24	0.06471
	TAM	20.73	0.04596

## Sheet: FIG 3B
	Invasive cell count (mean)	5637	T24	UM-UC-3
	Control	73	215	31
	CM	169	366	115
	CM and anti-CXCL8 neutralizing antibody	55	212	49

## Sheet: FIG 3C
		RT-PCR MMP-9 mean Cq	5637		T24		UM-UC-3
			Cq	Cq SD	Cq	Cq SD	Cq	Cq SD
		Control	33.47	1.33307	24.83	0.11448	30.34	0.14269
		CM	24.94	0.12486	28.69	0.23916	23.32	0.01316
		CM and anti-CXCL8 neutralizing antibody	32.39	0	35.38	0	29.26	0.15804
		RT-PCR GADPH mean Cq	5637		T24		UM-UC-3
			Cq	Cq SD	Cq	Cq SD	Cq	Cq SD
		Control	24.47	0.27483	21.06	0.13496	25.18	0
		CM	22.6	0.09496	26.28	0.60599	20.26	0.02944
		CM and anti-CXCL8 neutralizing antibody	25.38	0	26.83	0	23.4	0

## Sheet: FIG 3D
			5637				T24				UM-UC-3
		Control	CM	CM and anti-CXCL8 neutralizing antibody		Control	CM	CM and anti-CXCL8 neutralizing antibody		Control	CM	CM and anti-CXCL8 neutralizing antibody
		121.204	533.729	216.322		64.1477	902.065	533.803		91.0064	875.328	658.526
		183.899	611.337	285.175		25.2695	951.463	495.296		83.6611	792.482	603.918
		148.063	582.698	294.969		42.2602	874.776	448.627		114.23	928.364	537.142

## Sheet: FIG 4B
Wound Healing Percentage for 24h
	5637		T24		UM-UC-3
	MEAN	SD	MEAN	SD	MEAN	SD
Control	20	1.7893	39.85	7.4534	43.49	6.5635
CM	81.81	3.5963	100	7.9429	92.74	8.872
CM and anti-CXCL8 neutralizing antibody	48.41	4.0917	29.94	6.3791	51.5	5.1953

## Sheet: FIG 4C
			5637			T24			UM-UV-3
			mean	SD		mean	SD		mean	SD
		Control	0.49036	0.07222		0.62853	0.08014		0.49632	0.19038
		CM	0.00473	0.00365		0.02126	0.00245		0.00473	0.00365
		CM and anti-CXCL8 neutralizing antibody	0.00245	0.00245		0.00131	0.00131		0.10127	0.10127

[truncated: 4 more sheets: FIG 4E, FIG 5B, FIG 5C, FIG 5E]
